# Supplementary material
Source: ML conference proceedings conference paper supplement (https://openreview.net/forum?id=ZInwrlkQ3f)
Supplement: supplementary_material [file attachment]

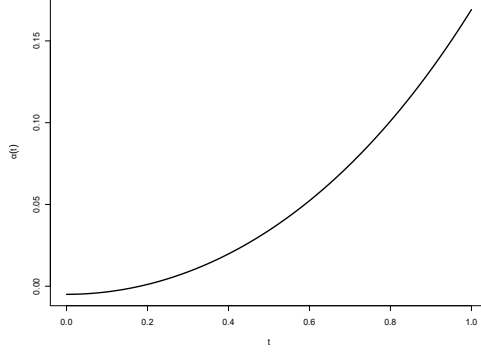Figure 1: Minimum excess risk  $\alpha(t)$  for the example in Section 3

## A Additional graph of $\alpha(t)$ from Section 3

Figure 1 displays a graph of  $\alpha(t)$  for the example in Section 3.

## B Auxiliary lemmas

**Lemma B.1.** *Define*

$$h(r) = \frac{1 - r^2/4}{r\sqrt{1 - r^2/4 - r^2/4}}.$$

Suppose that  $\pi$  is the uniform measure on  $\mathbb{S}^{d-1}$ . For all  $d > 2$  and all  $r > 0$ ,

$$-\log \pi(B_r(\theta_0)) \lesssim d \log(h(r \wedge 1)).$$

*Proof.* In order to compute  $\pi(B_r(\theta_0))$ , we must first compute the surface area of the set  $A = \{x: \|x\| = 1, \|x - v/s\| \leq r\}$ . Let  $\text{Beta}(a, b)$  be the Beta function and let  $I_x(a, b)$  be the regularized incomplete Beta function. If  $r < \sqrt{2}$ , then the set  $A$  is a spherical cap with radius  $R = r\sqrt{1 - r^2/4}$  and height  $H = r^2/2$ , which has surface area:

$$\text{SA}(A) = \frac{\pi^{d/2} R^{d-1}}{\Gamma(d/2)} \cdot I_{H(2R-H)/R^2} \left( \frac{d-1}{2}, 1/2 \right).$$

If  $r > \sqrt{2}$ , letting  $H' = 2 - r^2/2$ , it follows that  $A$  has surface area:

$$\text{SA}(A) = \frac{\pi^{d/2} R^{d-1}}{\Gamma(d/2)} \left( 1 - I_{H'(2R-H')/R^2} \left( \frac{d-1}{2}, 1/2 \right) \right).$$

We focus on the case where  $r < \sqrt{2}$ , it then follows that

$$\pi(B_r(\theta_0)) = \frac{1}{2} \cdot I_{H(2R-H)/R^2} \left( \frac{d-1}{2}, \frac{1}{2} \right).$$

Now, define

$$g(r) = H(2R - h)/R^2 = \frac{r\sqrt{1 - r^2/4 - r^2/4}}{1 - r^2/4}.$$

Note that  $g$  is decreasing toward 0 as  $r \rightarrow 0$ . One can show that for  $d > 2$ , we have that

$$I_{g(r)} \left( \frac{d-1}{2}, \frac{1}{2} \right) \geq \frac{2\sqrt{\pi}}{d-1} \left( \frac{d}{2} - 1 \right)^{-1/2} g(r)^{d/2-1/2}.$$

Therefore, for

$$\pi(B_r(\theta_0)) \geq \frac{1}{2} \cdot \frac{2\sqrt{\pi}}{d-1} \left(\frac{d}{2} - 1\right)^{-1/2} g(r)^{d/2-1/2}.$$

Taking the negated log gives that

$$-\log \pi(B_r(\theta_0)) \lesssim d \log(1/g(r)).$$

The result follows from the fact that  $h(r) = 1/g(r)$ .  $\square$

**Lemma B.2.** *Let  $g_\kappa$  be Tukey's biweight function. Then, the VC dimension of the class of functions given by  $\{g_\kappa(X^\top \theta - Y) : \theta \in \mathbb{R}^d\}$  is  $d + 1$ .*

*Proof.* First, note that the class of real-valued linear functions on  $\mathbb{R}^d$ , denoted by  $\mathcal{F}$ , satisfies  $\text{VC}(\mathcal{F}) = d + 1$ . We can then write  $(X^\top \theta - Y)^2 = ((X^\top \theta - Y) \vee (Y - X^\top \theta))^2$ . Now, the subgraphs of  $\{(X^\top \theta - Y) \vee (Y - X^\top \theta) : \theta \in \mathbb{R}^d\}$  are the union of the subgraphs of  $\{Y - X^\top \theta : \theta \in \mathbb{R}^d\}$  and  $\{X^\top \theta - Y : \theta \in \mathbb{R}^d\}$ , which is simply the set of subgraphs of linear functions. Thus,  $\text{VC}(\{(X^\top \theta - Y) \vee (Y - X^\top \theta) : \theta \in \mathbb{R}^d\}) = d + 1$ . Next, note that  $g_\kappa$  can be written as

$$g_\kappa(\theta) = \frac{\kappa^2}{6} \left(1 - \left[1 - \frac{(X^\top \theta - Y)^2}{\kappa^2}\right]^3\right) \wedge \frac{\kappa^2}{6},$$

which is a monotonic function on  $\mathbb{R}^+$ . It follows from the permanence properties of VC-dimension, e.g., see Lemma 7.12 of (Sen, 2018), that

$$\text{VC}(\{g_\kappa(X^\top \theta - Y) : \theta \in \mathbb{R}^d\}) = \text{VC}(\mathcal{F}) = d + 1. \quad \square$$

**Lemma B.3.** *Let  $X, Y$  be as in Section 3. Then, for all  $t \geq \sqrt{d/n}$  we have that*

$$\Pr \left( \sup_{\theta \in \mathbb{S}^{d-1}} \left| \frac{1}{n} \sum_{i=1}^n \log \sigma(X_i \langle X_i, \theta \rangle) - \mathbb{E}_\mu \log \sigma(Y \langle X, \theta \rangle) \right| \geq t \right) \leq 2e^{-nt^2/32}.$$

*Proof.* Let  $Z = (Z_1, \dots, Z_n)$ , where  $Z$  is defined in Section 3 and let  $Z' \sim \mathcal{N}(v, I)$  be independent of  $Z$ . Define

$$g_\theta(Z) = \frac{1}{n} \sum_{i=1}^n \log \sigma(\langle Z_i, \theta \rangle) - \mathbb{E} \log \sigma(\langle Z', \theta \rangle).$$

Note that  $g_\theta$  are all  $1/\sqrt{n}$ -Lipschitz functions of  $Z$ . It follows that  $\sup_{\theta \in \mathbb{S}^{d-1}} g_\theta$  is also a  $1/\sqrt{n}$ -Lipschitz function of  $Z$ . A log-Sobolev inequality on finite-dimensional Gaussian space gives that

$$\Pr \left( \sup_{\theta \in \mathbb{S}^{d-1}} g_\theta(Z) \geq \mathbb{E} \sup_{\theta \in \mathbb{S}^{d-1}} g_\theta(Z) + t \right) \leq e^{-nt^2}.$$

We can further write

$$\mathbb{E} \sup_{\theta \in \mathbb{S}^{d-1}} g_\theta(Z) = \mathbb{E} \sup_{\theta \in \mathbb{S}^{d-1}} g_\theta(Z) - \sup_{\theta \in \mathbb{S}^{d-1}} g_\theta(0) + \sup_{\theta \in \mathbb{S}^{d-1}} g_\theta(0) \leq \frac{1}{\sqrt{n}} \mathbb{E} \|Z\| = \sqrt{\frac{d}{n}}.$$

As a result, for  $t \geq \sqrt{d/n}$  we have that

$$\Pr \left( \sup_{\theta \in \mathbb{S}^{d-1}} \left| \frac{1}{n} \sum_{i=1}^n \log \sigma(Y_i \langle X_i, \theta \rangle) - \mathbb{E}_\mu \log \sigma(Y \langle X, \theta \rangle) \right| \geq t \right) \leq 2e^{-nt^2/32}. \quad \square$$

*Proof of Theorem 3.1.* The conditions required for Theorem 2.1 have been checked in Section 3, and so we can apply Lemma 6.1. In this case, we have that  $t_0 = 4\sqrt{d/n}$  and so it suffices to have  $n \geq 8d/\alpha(t)$ . Furthermore, in this case,  $c_1, c_2$  are universal constants, and so the equation 6.7 becomes  $n \gtrsim (\log(1/\gamma) \vee d)/\alpha(t)^2$ . The next step is to bound

$$-\log \pi(B_{\alpha(t)/8(\sqrt{d} \vee s)}(\theta_0)).$$

An application of Lemma B.1 with  $r = \alpha(t)/8(\sqrt{d} \vee s)$  gives the result.  $\square$

*Proof of Theorem 4.1.* Let  $\mathcal{F} = \{6\ell(\theta, \cdot, \cdot)/\kappa^2 : \theta \in \mathbb{R}^d\}$ . It follows from Lemma B.2 that  $\text{VC}(\mathcal{F}) = d + 1$  and that for any  $f \in \mathcal{F}$  we have that  $\|f\| \leq 1$ . Thus, an application of Talagrand's inequality (Talagrand, 1994, Theorem 1.1), see also (Sen, 2018, Theorem 7.11), or (Kosorok, 2008, Theorem 9.3) implies that there is some universal  $c > 0$  such that for all  $n \geq 1$  and for all  $t > 0$ , it holds that

$$\Pr \left( \sup_{\theta \in \mathbb{R}^d} |\hat{R}_n(\theta) - R(\theta)| > t \right) \leq e^{d \log(cn/d) - 72nt^2/\kappa^4}. \quad (\text{B.1})$$

Thus, Condition 3 is satisfied with  $t_0 = 0$ ,  $c_1 = (cn/d)^d$  and  $c_2 = 72/\kappa^4$ . The remaining conditions of Theorem 2.1 were checked in Section 4, thus, we can apply Lemma 6.1. The condition on  $n$  reduces to the following

$$n \gtrsim \kappa^2 \frac{\log(1/\gamma) \vee d(\log(\frac{\kappa}{c\alpha(t)}) \vee 1)}{\alpha(t)^2}.$$

Then, Lemma B.4 of (Ramsay et al., 2024) (stated below for convenience) gives that

$$-\log \pi(B_{\alpha(t)/8\kappa(\sqrt{d} \vee \|v\|)}(\theta_0)) \lesssim \frac{\|\theta_0 - \eta\|^2}{\rho^2} + d \log \left( \frac{\kappa\rho(d \vee \|v\|)}{\alpha(t)} \right).$$

Combining this inequality with equation 6.7 yields the condition

$$\beta \gtrsim \kappa \frac{\log(1/\gamma) \vee \left[ \|\theta_0 - \eta\|^2 / \rho^2 + d \log \left( \frac{\kappa\rho(d \vee \|v\|)}{\alpha(t)} \right) \right]}{\alpha(t)}. \quad \square$$

*Proof of Theorem 5.1.* The conditions of Theorem 2.1 were checked in Section 5, thus, we can apply Lemma 6.1. Note that  $t_0 = C\sqrt{d/n}$ , which implies that the bounds in Lemma 6.1 hold for  $n \gtrsim d/\alpha(t)^2$ . Next, the inequality equation 6.7 reduces to  $n \gtrsim \log(1/\gamma)/\alpha(t)^2$ . It remains to bound  $-\log \pi(B_t(\theta_0))$  for each prior. For  $\pi$  uniform on the unit sphere, applying Lemma B.1 yields that equation 6.7 reduces to

$$\beta \gtrsim \frac{\log(1/\gamma) \vee d(\log h(t^4(1 - t^2/4)/16))}{\lambda t^4(1 - t^2/4)}.$$

In Rademacher prior PCA, we take  $\pi$  to be uniform on  $\{\pm 1\}^d$ . For such a prior, we have that each vector can be observed with probability  $2^d$ . Computing  $B_r(\theta_0)$  requires counting the number of vectors within  $r$  of  $\theta_0$ . The quantity  $\lfloor r^2/2 \rfloor$  gives the maximum Hamming distance between  $x \in B_r(\theta_0)$  and  $\theta_0$ . Let  $Z \sim \text{Binomial}(d, 1/2)$  and  $\text{KL}(p, q)$  be the Kullback–Leibler divergence of  $\text{Binomial}(1, p)$  with respect to  $\text{Binomial}(1, q)$ . Following Ash (1990), we have that there exists a universal constant  $c > 0$  such that

$$\pi(B_{\alpha(t)/8L}(\theta_0)) = \pi(B_{t^4/16d^{3/2}}(\theta_0)) \geq \Pr(Z \leq ct^8/d^3) \gtrsim \frac{1}{\sqrt{d}} e^{-d \text{KL}(t^8/d^4, 1/2)}.$$

This results in

$$-\log \pi(B_{t^4/16d^{3/2}}(\theta_0)) \lesssim d \text{KL}(t^8/d^4, 1/2) \log d.$$

In this case, we have that

$$\beta \geq C \frac{\text{KL}(t^8/d^4, 1/2) \cdot d \log d}{4\lambda \lfloor t^2/2 \rfloor (d - \lfloor t^2/2 \rfloor)}.$$

Combining this with the bound  $\beta \geq Cd/\alpha(t)$  yields

$$\beta \geq C \frac{(\text{KL}(t^8/d^4, 1/2) \cdot d \log d) \vee d}{4\lambda \lceil t^2/2 \rceil (d - \lceil t^2/2 \rceil)}.$$

In the sparse PCA case, we have that  $\tau^2$  is the number of 1s in the vector. Each vector in  $E$  may occur with probability  $1/\binom{d}{\tau^2}$ . Furthermore, it is easy to show that  $\alpha(t)/8L \gtrsim \frac{t^2(\tau^2 \wedge (d-\tau^2))}{\tau^3}$ . This implies that  $\lfloor \frac{\tau^2}{2} \rfloor \gtrsim a_{t,\tau,d}$ , with  $a_{t,\tau,d} = \frac{t^4(\tau^2 \wedge (d-\tau^2))^2}{\tau^6}$ . We have that

$$\pi(B_{\alpha(t)/8L}(\theta_0)) = \sum_{i=0}^{\lfloor \frac{\tau^2}{2} \rfloor} \frac{\binom{\tau^2}{i} \binom{d-\tau^2}{i}}{\binom{d}{\tau^2}} \geq \frac{\binom{\tau^2}{a_{t,\tau,d}} \binom{d-\tau^2}{a_{t,\tau,d}}}{\binom{d}{\tau^2}} \geq \left( \frac{\tau^2 \wedge (d-\tau^2)}{de} \right)^{2a_{t,\tau,d} + \tau^2 \wedge (d-\tau^2)}.$$

This results in

$$-\log \pi(B_{\alpha(t)/8L}(\theta_0)) \lesssim (a_{t,\tau,d} \vee \tau^2) \log d \lesssim \tau^2 \log d.$$

This bound yields the following condition on  $\beta$  for sparse PCA:

$$\beta \gtrsim \frac{\log(1/\gamma) \vee \tau^2 \log d}{\lambda \lceil t^2/2 \rceil (2\tau^2 - \lceil t^2/2 \rceil^2)}. \quad \square$$

*Proof of Theorem 5.2.* The conditions of Theorem 2.1 have been checked in Section 5 and applying Lemma 6.1 yields the following bound on  $n$

$$n \gtrsim \frac{\log(1/\gamma) \vee d \log k}{\lambda^2 (1 - (1 - t^2/2)^k)^2}.$$

It now remains to bound  $-\log \pi(B_{\alpha(t)/8k\lambda}(\theta_0))$ , which follows from applying Lemma B.1. As a result, equation 6.7 reduces to

$$\beta \gtrsim \frac{\log(1/\gamma) \vee d \log h((1 - (1 - t^2/2)^k)/8k)}{\lambda(1 - (1 - t^2/2)^k)}. \quad \square$$

We restate the following result from (Ramsay et al., 2024) for convenience.

**Lemma B.4** (Ramsay et al. (2024)). *If  $\pi = \mathcal{N}(\eta, \rho^2 I)$  with  $\rho \geq 1/4$ , then for all  $E \subset \mathbb{R}^d$ , all  $d > 2$  and all  $R \leq \rho$  it holds that*

$$-\log \pi(B_R(E)) \lesssim \frac{d(E, \eta)^2}{\rho^2} + d \log \left( \frac{\rho}{R} \vee d \right). \quad (\text{B.2})$$
